# Supplementary material for: Brush-like Polymer Prodrug with Aggregation-Induced Emission Features for Precise Intracellular Drug Tracking
Source: MDPI journal article supplement (doi:10.3390/bios12060373), 2022-05-29
Supplement: s1 [file s1]

# Brush-Like Polymer Prodrug with Aggregation-Induced Emission Features for Precise Intracellular Drug Tracking

Sanaz Naghibi <sup>1</sup>, Soheila Sabouri <sup>2</sup>, Yuning Hong <sup>2,3</sup>, Zhongfan Jia <sup>1,\*</sup>, Youhong Tang <sup>1,3,\*</sup>

1. Institute for NanoScale Science and Technology, College of Science and Engineering, Flinders University, Tonsley, SA 5042, Australia; sanaz.naghibi@flinders.edu.au (S.N.)

2. Department of Biochemistry and Chemistry, La Trobe Institute for Molecular Science, La Trobe University, Bundoora, VIC 3086, Australia; s.sabouri@latrobe.edu.au (S.S.); y.hong@latrobe.edu.au (Y.H.)

3. Australia-China Joint Research Centre on Personal Health Technologies, Tonsley, SA 5042, Australia

\* Correspondence: zhongfan.jia@flinders.edu.au (Z.J.); youhong.tang@flinders.edu.au (Y.T.);

Tel.: +61-8-8201-2804 (Z.J.); +61-8-8201-2138 (Y.T.)

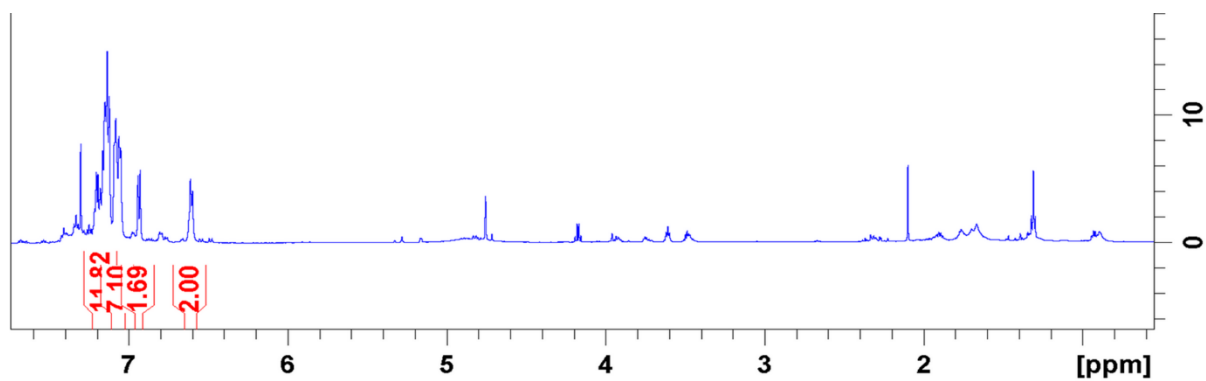

Figure S1.  $^1\text{H}$ -NMR spectrum of the synthesized TPEOH.

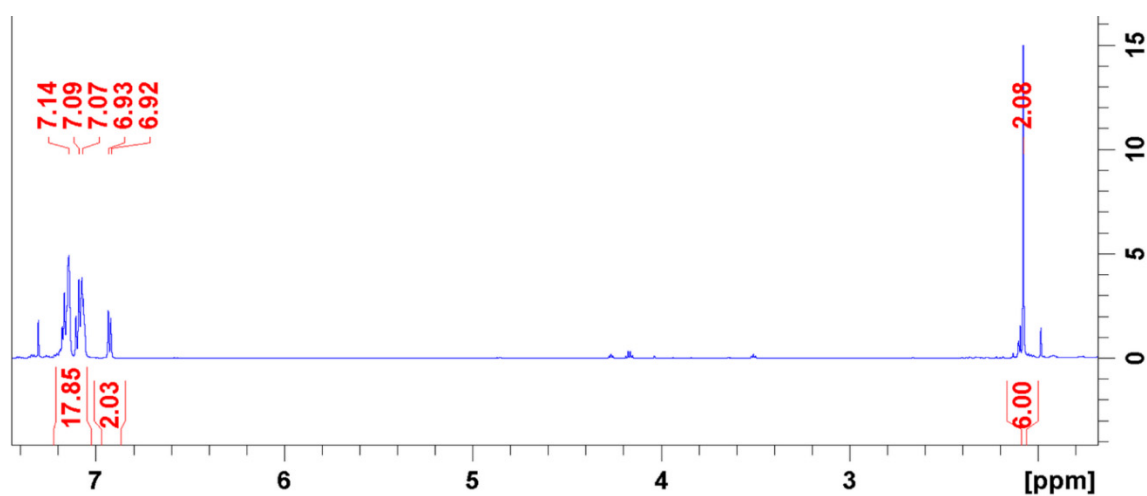

Figure S2.  $^1\text{H}$ -NMR spectrum of the synthesized TPEBIB.

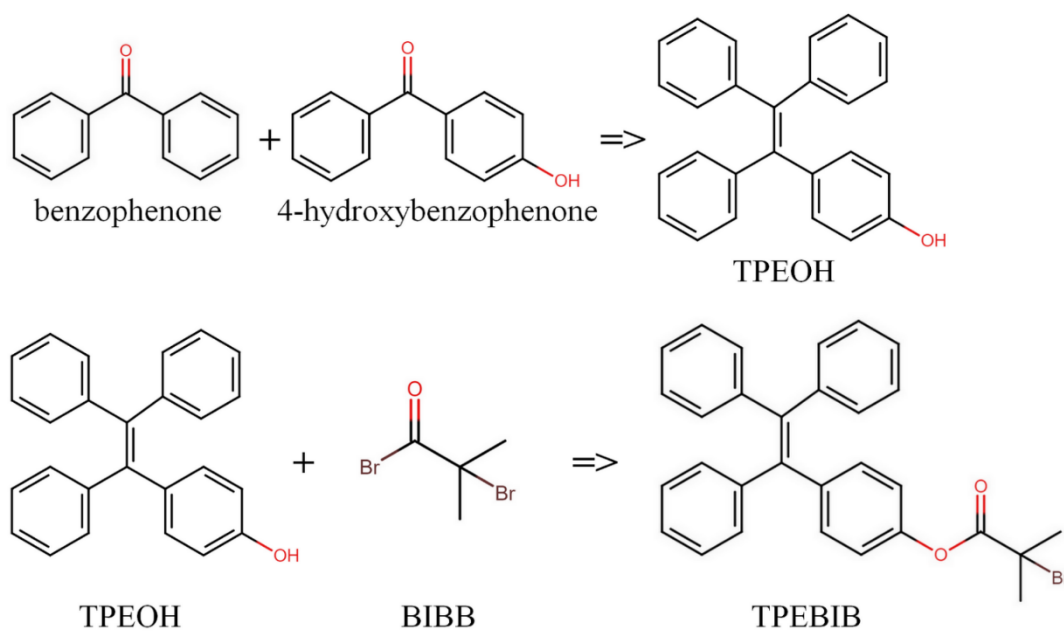

Figure S3. Synthesis pathway of TPEBIB. Firstly, TPEOH was synthesized using benzophenone and 4-hydroxybenzophenone, then TPEBIB was prepared by adding BIBB to the TPEOH compound.

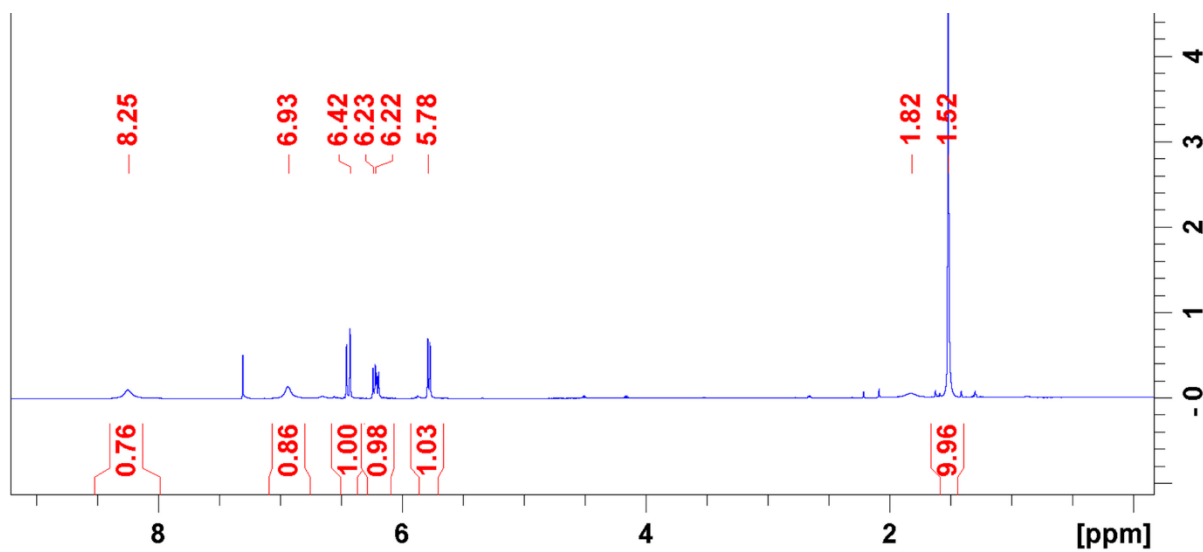

Figure S4.  $^1\text{H}$ -NMR spectrum of the synthesized hydrazine monomer.

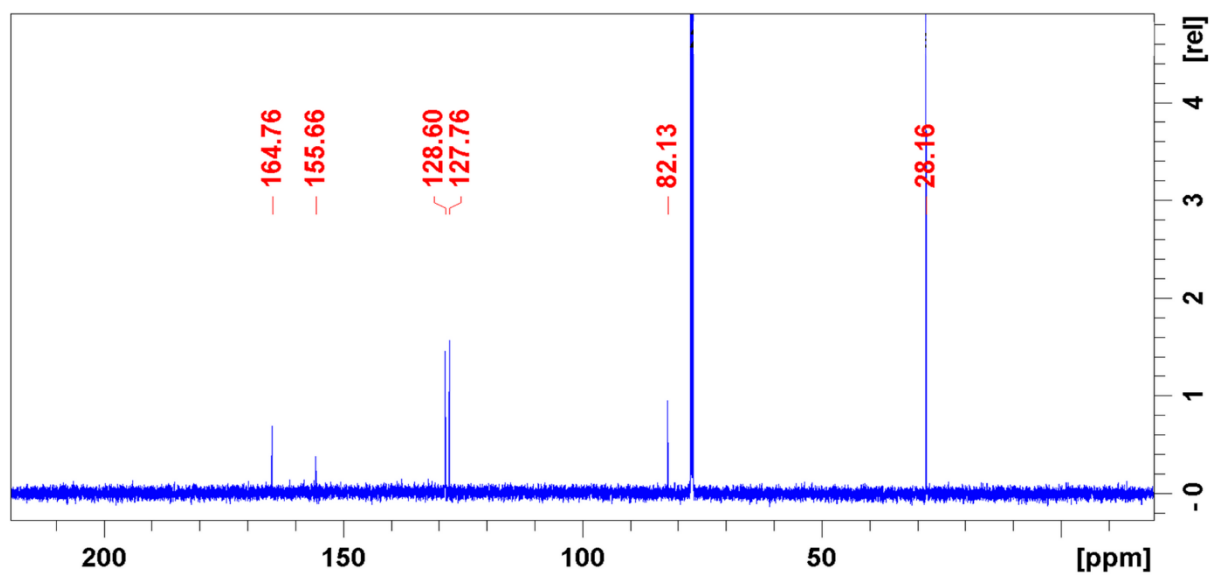

Figure S5.  $^{13}\text{C}$ -NMR spectrum of the synthesized hydrazine monomer.

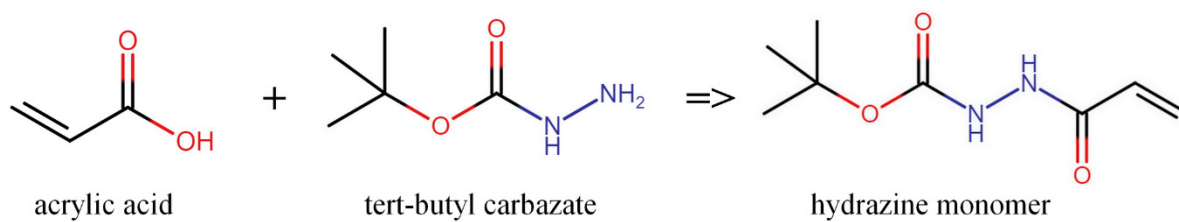

Figure S6. Synthesis pathway of the hydrazine monomer using acrylic acid and tert-butyl carbazate.

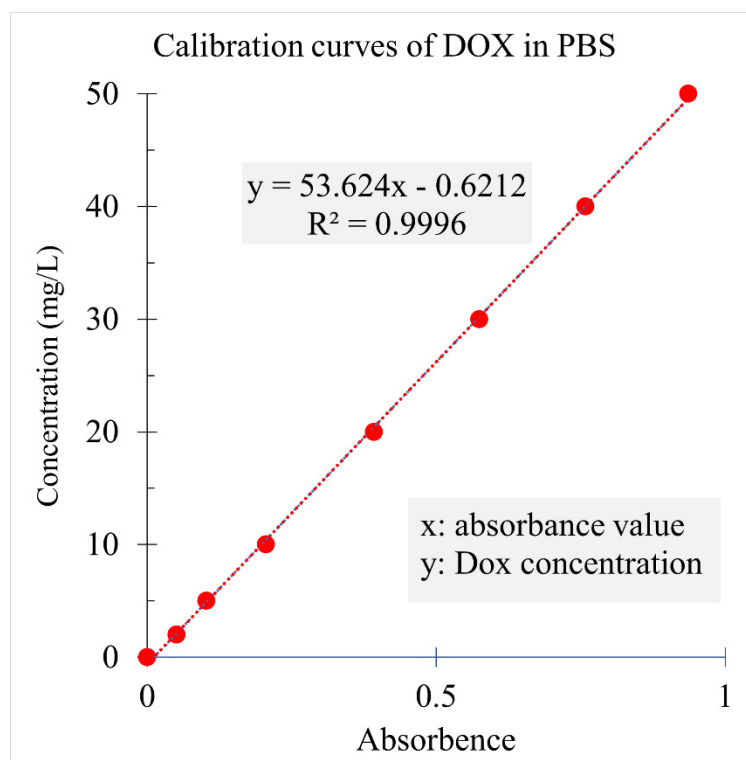

**Figure S7.** The calibration curve of DOX in PBS. As the  $R^2$  value is very close to 1, the relation between parameters  $x$  and  $y$  is a positive linear relationship, so the line equation could be used for measuring DOX concentration according to the corresponding absorbance value.

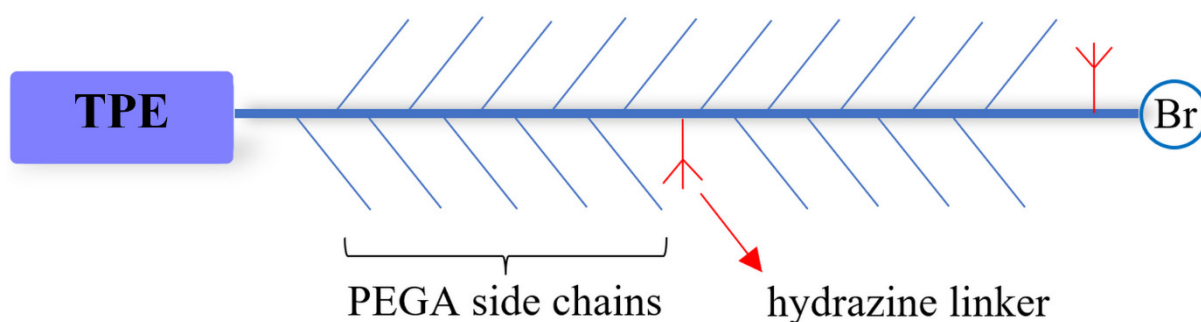

**Figure S8.** Schematic illustration of the synthesized brush-like polymer. According to the  $^1\text{H-NMR}$  result in Figure 2(a), the polymerization degree or  $n$  is 21, in which 19 units of PEGA side chain end and 2 units of hydrazine end exist in each polymer chain.

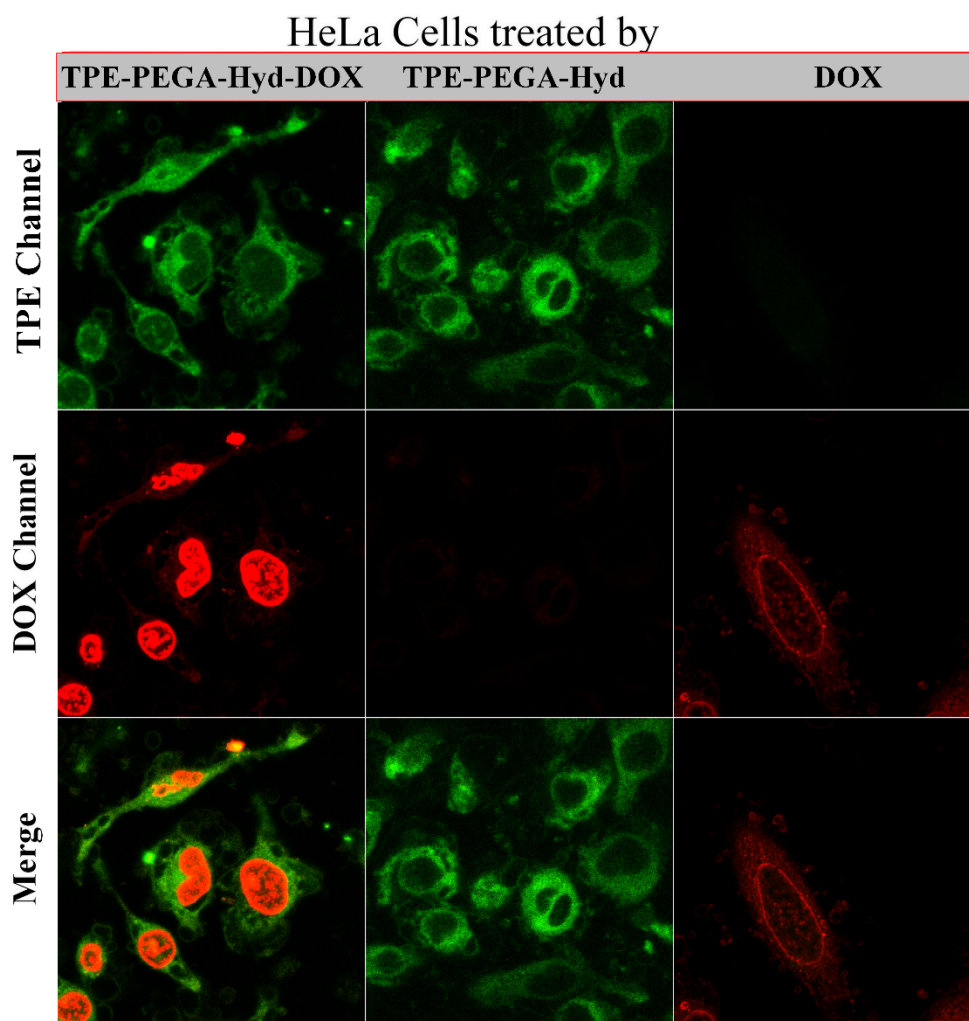

**Figure S9.** Confocal images of the HeLa cells treated by pristine DOX, TPE-PEGA-Hyd polymer, and TPE-PEGA-Hyd-DOX prodrug with a concentration of 10 mg/L after 24 h of incubation. The excitation wavelengths for DOX and AIE channels were 488 and 405 nm, whereas their emission wavelength ranges were 570-620 and 450-520 nm, respectively. In comparison with Figure 8, the effects of the synthesized prodrug on cancer cells are more severe and significant.

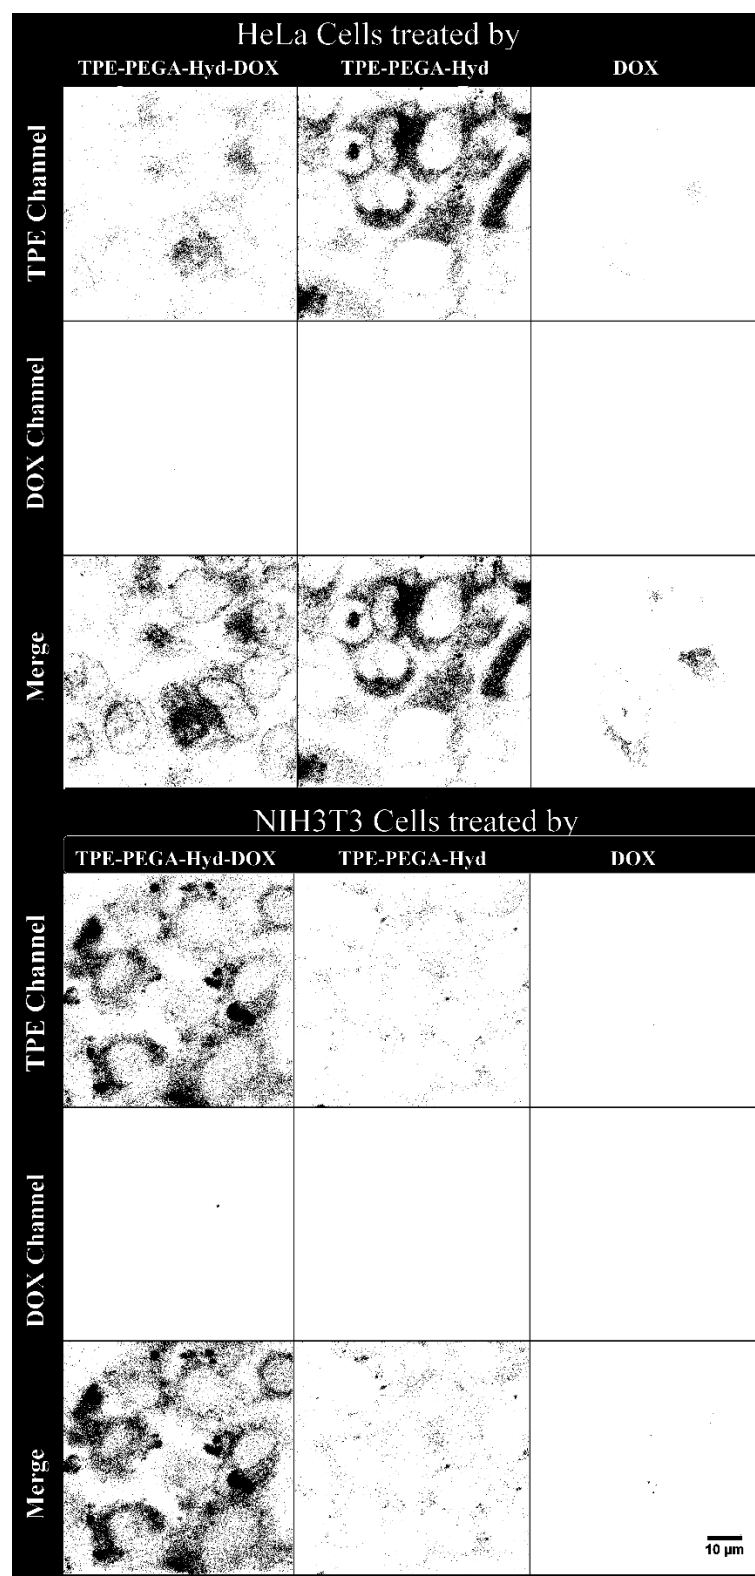

**Figure S10.** The Nuclei of the cells have been labelled using an image analyser. This is a simple way illustrating the exact location of drug release, which has been targeted by the carrier.

**Table S1.** Numerical data of the Cytotoxicity assay. Figure 7 has been prepared according to these data. Each Table represents readings for each data point of 12 independent samples, average, and standard deviation value, which is calculated using  $\sigma = \sqrt{\frac{\sum(X_i - \mu)^2}{N}}$ , where  $\sigma$ ,  $X_i$ ,  $\mu$ , and  $N$  are standard deviation, each value from the population, the population mean and the size of the population, respectively. Average values have been utilized for drawing graphs of Figure 7.

| Sample   | HeLa cell / DOX, Figure 7a |          |          |          |          |          |          |             |
|----------|----------------------------|----------|----------|----------|----------|----------|----------|-------------|
| Time     | 24 h                       |          |          |          |          |          |          |             |
| C (mg/L) | 100                        | 10       | 1        | 0.1      | 0.01     | 0.001    | 0.0001   | 0           |
| 1        | 50                         | 80       | 75.75758 | 87.5     | 93.54839 | 100      | 96.2963  | 92.59259259 |
| 2        | 55.55556                   | 80.64516 | 75       | 89.65517 | 90       | 96.15385 | 93.54839 | 96.875      |
| 3        | 52.17391                   | 72.22222 | 76.19048 | 91.66667 | 89.28571 | 94.59459 | 100      | 97.22222222 |
| 4        | 58.62069                   | 71.42857 | 75       | 88.88889 | 85.18519 | 93.10345 | 100      | 97.05882353 |
| 5        | 57.57576                   | 66.66667 | 68.42105 | 84.375   | 89.28571 | 95.12195 | 96.9697  | 96.66666667 |
| 6        | 50                         | 65       | 78.26087 | 85.29412 | 93.33333 | 97.36842 | 100      | 96.96969697 |
| 7        | 56                         | 61.53846 | 76.92308 | 93.33333 | 100      | 90.90909 | 100      | 97.2972973  |
| 8        | 48.3871                    | 60.86957 | 72.97297 | 90.32258 | 94.44444 | 93.02326 | 91.17647 | 100         |
| 9        | 51.42857                   | 64.51613 | 74.19355 | 87.09677 | 93.54839 | 100      | 96.66667 | 92.10526316 |
| 10       | 51.51515                   | 60       | 66.66667 | 91.17647 | 96.2963  | 100      | 93.93939 | 100         |
| 11       | 55.88235                   | 69.56522 | 70.83333 | 87.87879 | 89.47368 | 97.22222 | 100      | 92.85714286 |
| 12       | 47.05882                   | 63.15789 | 66.66667 | 90       | 89.65517 | 97.4359  | 95       | 96.875      |
| $\mu$    | 52.84983                   | 67.96749 | 73.07385 | 88.93232 | 92.00469 | 96.24439 | 96.96641 | 96.37664211 |
| $\sigma$ | 3.766                      | 6.999    | 4.001    | 2.629    | 3.955    | 2.995    | 3.086    | 2.597       |

| Sample   | HeLa cell / DOX, Figure 7a |          |          |          |          |          |          |          |
|----------|----------------------------|----------|----------|----------|----------|----------|----------|----------|
| Time     | 48 h                       |          |          |          |          |          |          |          |
| C (mg/L) | 100                        | 10       | 1        | 0.1      | 0.01     | 0.001    | 0.0001   | 0        |
| 1        | 20                         | 33.33333 | 62.5     | 78.125   | 88.23529 | 91.42857 | 91.30435 | 100      |
| 2        | 33.33333                   | 19.35484 | 62.96296 | 84       | 80.64516 | 97.14286 | 94.73684 | 93.54839 |
| 3        | 28.57143                   | 27.77778 | 69.56522 | 84.375   | 88.23529 | 89.74359 | 96.2963  | 96.875   |
| 4        | 33.33333                   | 28.57143 | 66.66667 | 82.14286 | 84.375   | 93.54839 | 92.59259 | 91.42857 |
| 5        | 36.84211                   | 33.33333 | 64.70588 | 80.95238 | 86.04651 | 95.12195 | 95.45455 | 93.93939 |
| 6        | 18.18182                   | 35       | 68       | 85.18519 | 92.68293 | 97.36842 | 92.59259 | 97.14286 |
| 7        | 25                         | 38.46154 | 66.66667 | 78.26087 | 90.90909 | 96.66667 | 96.42857 | 96.66667 |
| 8        | 28.57143                   | 39.13043 | 73.91304 | 82.75862 | 84.61538 | 94.59459 | 89.65517 | 93.10345 |
| 9        | 28                         | 35.48387 | 60.86957 | 82.75862 | 88.23529 | 92.30769 | 96       | 97.22222 |
| 10       | 42.10526                   | 40       | 79.41176 | 74.28571 | 87.87879 | 100      | 92.59259 | 90.625   |
| 11       | 39.13043                   | 30.43478 | 75       | 84.375   | 85.71429 | 96.66667 | 88.46154 | 96.875   |
| 12       | 40.90909                   | 36.84211 | 81.81818 | 81.25    | 80       | 100      | 90.47619 | 96.55172 |
| $\mu$    | 31.16485                   | 33.14362 | 69.34    | 81.5391  | 86.46442 | 95.38245 | 93.04927 | 95.33152 |
| $\sigma$ | 7.830103                   | 5.885045 | 6.78842  | 3.222307 | 3.741752 | 3.218151 | 2.732985 | 2.765909 |

| Sample   | HeLa cell / DOX, Figure 7a |          |          |          |          |          |          |          |
|----------|----------------------------|----------|----------|----------|----------|----------|----------|----------|
| Time     | 72 h                       |          |          |          |          |          |          |          |
| C (mg/L) | 100                        | 10       | 1        | 0.1      | 0.01     | 0.001    | 0.0001   | 0        |
| 1        | 11.76471                   | 24.32432 | 59.25926 | 72       | 80.64516 | 89.28571 | 86.36364 | 95.83333 |
| 2        | 5.555556                   | 26.47059 | 48.27586 | 76       | 77.41935 | 88.57143 | 92.85714 | 100      |
| 3        | 20                         | 27.5     | 64.28571 | 85       | 88.46154 | 97.2973  | 92.85714 | 95.2381  |
| 4        | 21.42857                   | 30.76923 | 67.85714 | 84       | 93.54839 | 85.29412 | 92       | 96.42857 |
| 5        | 16.66667                   | 27.58621 | 62.5     | 75       | 89.74359 | 90       | 86.36364 | 100      |
| 6        | 17.3913                    | 21.62162 | 77.77778 | 80.76923 | 89.74359 | 88.88889 | 95.65217 | 100      |
| 7        | 11.11111                   | 36       | 72       | 65.21739 | 85.29412 | 88.46154 | 94.73684 | 90       |
| 8        | 18.18182                   | 33.33333 | 58.33333 | 70       | 82.05128 | 90.32258 | 85.18519 | 100      |
| 9        | 10                         | 45.45455 | 64       | 84.21053 | 86.11111 | 93.54839 | 100      | 91.30435 |
| 10       | 23.80952                   | 22.22222 | 62.96296 | 68       | 89.74359 | 90       | 95.45455 | 100      |
| 11       | 17.3913                    | 19.35484 | 52.17391 | 76       | 81.81818 | 86.48649 | 100      | 95.65217 |
| 12       | 14.28571                   | 25       | 58.62069 | 76.19048 | 76.47059 | 96.875   | 95       | 93.54839 |
| $\mu$    | 15.63219                   | 28.30308 | 62.33722 | 76.0323  | 85.08754 | 90.41929 | 93.03919 | 96.50041 |
| $\sigma$ | 5.255084                   | 7.247245 | 8.031536 | 6.5258   | 5.408678 | 3.714153 | 4.938272 | 3.592512 |

| Sample   | NIH3T3 cell / DOX, Figure 7b |    |   |     |      |       |        |   |
|----------|------------------------------|----|---|-----|------|-------|--------|---|
| Time     | 24 h                         |    |   |     |      |       |        |   |
| C (mg/L) | 100                          | 10 | 1 | 0.1 | 0.01 | 0.001 | 0.0001 | 0 |

|          |          |          |          |          |          |          |          |          |
|----------|----------|----------|----------|----------|----------|----------|----------|----------|
| 1        | 36.84211 | 80.55556 | 89.28571 | 96.9697  | 82.05128 | 93.75    | 94.59459 | 100      |
| 2        | 56.25    | 79.54545 | 96.2963  | 94.73684 | 88.37209 | 95.34884 | 91.17647 | 95.74468 |
| 3        | 29.62963 | 70.96774 | 94.11765 | 94.87179 | 93.33333 | 94.59459 | 84.84848 | 97.4359  |
| 4        | 23.07692 | 79.54545 | 87.5     | 92.85714 | 97.4359  | 97.67442 | 96.66667 | 89.74359 |
| 5        | 33.33333 | 81.57895 | 87.80488 | 97.22222 | 93.93939 | 100      | 94.59459 | 94.87179 |
| 6        | 25       | 86.66667 | 92.85714 | 86.48649 | 93.75    | 92.68293 | 95       | 92.85714 |
| 7        | 37.5     | 78.26087 | 93.93939 | 100      | 95.34884 | 95.12195 | 92.5     | 91.42857 |
| 8        | 26.08696 | 77.5     | 96.15385 | 94.59459 | 97.22222 | 97.67442 | 93.18182 | 100      |
| 9        | 30.76923 | 71.15385 | 96.9697  | 97.36842 | 96.9697  | 97.61905 | 87.80488 | 97.36842 |
| 10       | 42.85714 | 77.77778 | 96.55172 | 92.68293 | 100      | 97.82609 | 92.10526 | 97.4359  |
| 11       | 16.66667 | 75       | 87.17949 | 97.22222 | 89.3617  | 90.625   | 96.875   | 95.34884 |
| 12       | 27.77778 | 81.39535 | 91.17647 | 96.9697  | 93.93939 | 100      | 90.47619 | 96.9697  |
| $\mu$    | 32.14915 | 78.32897 | 92.48602 | 95.16517 | 93.47699 | 96.07644 | 92.48533 | 95.76704 |
| $\sigma$ | 10.37832 | 4.422539 | 3.770777 | 3.445796 | 4.880549 | 2.886007 | 3.549416 | 3.161782 |

|          |                              |          |          |          |          |          |          |          |
|----------|------------------------------|----------|----------|----------|----------|----------|----------|----------|
| Sample   | NIH3T3 cell / DOX, Figure 7b |          |          |          |          |          |          |          |
| Time     | 48 h                         |          |          |          |          |          |          |          |
| C (mg/L) | 100                          | 10       | 1        | 0.1      | 0.01     | 0.001    | 0.0001   | 0        |
| 1        | 9.52381                      | 84.44444 | 88.37209 | 92.30769 | 85.29412 | 100      | 91.42857 | 91.11111 |
| 2        | 12.5                         | 71.73913 | 95.12195 | 90.2439  | 96.42857 | 97.87234 | 97.22222 | 92.10526 |
| 3        | 13.33333                     | 85.36585 | 93.61702 | 94.59459 | 88.57143 | 95.55556 | 97.36842 | 88.88889 |
| 4        | 14.70588                     | 83.09859 | 94.59459 | 97.2973  | 94.59459 | 97.5     | 95       | 90.47619 |
| 5        | 10.71429                     | 79.66102 | 96.9697  | 100      | 92.10526 | 92.5     | 87.5     | 88.63636 |
| 6        | 11.76471                     | 70.90909 | 91.11111 | 91.17647 | 92.85714 | 92.10526 | 92.30769 | 92.30769 |
| 7        | 11.11111                     | 83.78378 | 92.30769 | 97.22222 | 97.14286 | 93.18182 | 84.78261 | 94.11765 |
| 8        | 21.05263                     | 86.36364 | 88.23529 | 95.45455 | 96.9697  | 88.63636 | 91.42857 | 94.59459 |
| 9        | 13.63636                     | 79.06977 | 84.09091 | 97.4359  | 91.17647 | 95.74468 | 94.44444 | 95.74468 |
| 10       | 13.33333                     | 79.24528 | 92.68293 | 97.2973  | 90.625   | 95.65217 | 97.22222 | 100      |
| 11       | 12.5                         | 79.48718 | 89.74359 | 92.10526 | 94.59459 | 97.61905 | 97.4359  | 96.875   |
| 12       | 8.333333                     | 70       | 90.625   | 88.09524 | 97.36842 | 89.74359 | 97.36842 | 96.9697  |
| $\mu$    | 12.70907                     | 79.43065 | 91.45599 | 94.43587 | 93.14401 | 94.6759  | 93.62576 | 93.48559 |
| $\sigma$ | 3.191557                     | 5.734815 | 3.547873 | 3.612134 | 3.782451 | 3.469986 | 4.243486 | 3.508814 |

|          |                              |          |          |          |          |          |          |          |
|----------|------------------------------|----------|----------|----------|----------|----------|----------|----------|
| Sample   | NIH3T3 cell / DOX, Figure 7b |          |          |          |          |          |          |          |
| Time     | 72 h                         |          |          |          |          |          |          |          |
| C (mg/L) | 100                          | 10       | 1        | 0.1      | 0.01     | 0.001    | 0.0001   | 0        |
| 1        | 6.25                         | 90.90909 | 92.5     | 91.42857 | 89.47368 | 92.68293 | 87.5     | 88       |
| 2        | 0                            | 80       | 90.90909 | 97.36842 | 93.54839 | 92.10526 | 100      | 97.22222 |
| 3        | 0                            | 88.23529 | 87.09677 | 95.12195 | 92.59259 | 94.87179 | 96.875   | 93.87755 |
| 4        | 10.52632                     | 85.71429 | 91.42857 | 88.37209 | 86.11111 | 96.9697  | 97.4359  | 88.09524 |
| 5        | 6.451613                     | 78.26087 | 87.5     | 92.10526 | 92.30769 | 97.22222 | 92.5     | 84.09091 |
| 6        | 0                            | 78.94737 | 92.5     | 93.93939 | 86.48649 | 96.875   | 87.5     | 95       |
| 7        | 10.34483                     | 77.77778 | 94.73684 | 97.2973  | 94.59459 | 94.73684 | 91.42857 | 93.18182 |
| 8        | 15.625                       | 84.21053 | 85.36585 | 89.74359 | 95.12195 | 89.74359 | 81.57895 | 97.67442 |
| 9        | 13.7931                      | 61.11111 | 82.97872 | 90.625   | 97.4359  | 97.14286 | 92.59259 | 95       |
| 10       | 8.695652                     | 85.71429 | 94.44444 | 93.93939 | 100      | 97.4359  | 93.54839 | 92.85714 |
| 11       | 0                            | 82.35294 | 91.17647 | 94.59459 | 88.37209 | 97.5     | 96.875   | 93.61702 |
| 12       | 5.263158                     | 86.36364 | 87.5     | 97.2973  | 91.17647 | 100      | 97.14286 | 90.69767 |
| $\mu$    | 6.412472                     | 81.6331  | 89.84473 | 93.48607 | 92.26841 | 95.60717 | 92.91477 | 92.44283 |
| $\sigma$ | 5.582216                     | 7.685595 | 3.697114 | 3.058878 | 4.235202 | 2.878588 | 5.307894 | 4.032659 |

|          |                                             |          |          |          |          |          |          |          |
|----------|---------------------------------------------|----------|----------|----------|----------|----------|----------|----------|
| Sample   | HeLa cell / TPE-PEGA-Hyd polymer, Figure 7c |          |          |          |          |          |          |          |
| Time     | 24 h                                        |          |          |          |          |          |          |          |
| C (mg/L) | 100                                         | 10       | 1        | 0.1      | 0.01     | 0.001    | 0.0001   | 0        |
| 1        | 93.75                                       | 96.15385 | 93.75    | 93.75    | 96.77419 | 91.48936 | 97.14286 | 100      |
| 2        | 96.66667                                    | 93.33333 | 93.10345 | 92.59259 | 97.5     | 97.82609 | 97.22222 | 96.77419 |
| 3        | 100                                         | 100      | 100      | 100      | 95.45455 | 90.625   | 98.50746 | 100      |
| 4        | 100                                         | 100      | 96.9697  | 97.4359  | 100      | 92.64706 | 100      | 98.46154 |
| 5        | 100                                         | 96.9697  | 91.89189 | 90.32258 | 93.18182 | 100      | 98.7013  | 97.01493 |
| 6        | 100                                         | 93.18182 | 97.5     | 96.9697  | 92.68293 | 100      | 97.05882 | 98.52941 |
| 7        | 100                                         | 100      | 96.2963  | 97.36842 | 96.66667 | 96.49123 | 100      | 97.22222 |
| 8        | 96.875                                      | 100      | 100      | 100      | 100      | 97.72727 | 100      | 98.4127  |
| 9        | 100                                         | 94.59459 | 100      | 100      | 93.10345 | 100      | 98.64865 | 98.30508 |



|          |          |          |          |          |          |          |          |          |
|----------|----------|----------|----------|----------|----------|----------|----------|----------|
| 10       | 94.11765 | 100      | 100      | 100      | 97.61905 | 100      | 97.10145 | 100      |
| 11       | 93.18182 | 100      | 97.77778 | 97.91667 | 100      | 98       | 100      | 100      |
| 12       | 100      | 100      | 94.87179 | 95.12195 | 100      | 96.61017 | 98.61111 | 100      |
| $\mu$    | 97.88259 | 97.85277 | 96.84674 | 96.78982 | 96.91522 | 96.78468 | 98.58282 | 98.72667 |
| $\sigma$ | 2.815994 | 2.841241 | 2.914491 | 3.229685 | 2.82032  | 3.4115   | 1.224752 | 1.261239 |

|          |                                             |          |          |          |          |          |          |          |
|----------|---------------------------------------------|----------|----------|----------|----------|----------|----------|----------|
| Sample   | HeLa cell / TPE-PEGA-Hyd polymer, Figure 7c |          |          |          |          |          |          |          |
| Time     | 48 h                                        |          |          |          |          |          |          |          |
| C (mg/L) | 100                                         | 10       | 1        | 0.1      | 0.01     | 0.001    | 0.0001   | 0        |
| 1        | 93.75                                       | 96.15385 | 93.75    | 93.75    | 96.77419 | 91.48936 | 97.22222 | 100      |
| 2        | 96.66667                                    | 93.33333 | 93.10345 | 92.59259 | 97.5     | 97.82609 | 97.2973  | 96.875   |
| 3        | 100                                         | 100      | 100      | 100      | 95.45455 | 90.625   | 98.52941 | 100      |
| 4        | 100                                         | 100      | 96.9697  | 97.4359  | 100      | 92.64706 | 100      | 98.48485 |
| 5        | 100                                         | 96.9697  | 91.89189 | 90.32258 | 93.18182 | 100      | 98.71795 | 97.10145 |
| 6        | 100                                         | 93.18182 | 97.5     | 96.9697  | 92.68293 | 100      | 97.14286 | 98.55072 |
| 7        | 100                                         | 100      | 96.2963  | 97.36842 | 96.66667 | 96.49123 | 100      | 97.2973  |
| 8        | 96.875                                      | 100      | 100      | 100      | 100      | 97.72727 | 100      | 98.4375  |
| 9        | 100                                         | 94.59459 | 100      | 100      | 93.10345 | 100      | 98.66667 | 98.33333 |
| 10       | 94.11765                                    | 100      | 100      | 100      | 97.61905 | 100      | 97.1831  | 100      |
| 11       | 93.18182                                    | 100      | 97.77778 | 97.91667 | 100      | 98       | 100      | 100      |
| 12       | 100                                         | 100      | 94.87179 | 95.12195 | 100      | 96.61017 | 98.63014 | 100      |
| $\mu$    | 97.88259                                    | 97.85277 | 96.84674 | 96.78982 | 96.91522 | 96.78468 | 98.6158  | 98.75668 |
| $\sigma$ | 2.815994                                    | 2.841241 | 2.914491 | 3.229685 | 2.82032  | 3.4115   | 1.190395 | 1.226115 |

|          |                                             |          |          |          |          |          |          |          |
|----------|---------------------------------------------|----------|----------|----------|----------|----------|----------|----------|
| Sample   | HeLa cell / TPE-PEGA-Hyd polymer, Figure 7c |          |          |          |          |          |          |          |
| Time     | 72 h                                        |          |          |          |          |          |          |          |
| C (mg/L) | 100                                         | 10       | 1        | 0.1      | 0.01     | 0.001    | 0.0001   | 0        |
| 1        | 93.75                                       | 96.15385 | 93.75    | 93.75    | 96.77419 | 91.48936 | 97.22222 | 100      |
| 2        | 96.66667                                    | 93.33333 | 93.10345 | 92.59259 | 97.5     | 97.82609 | 97.2973  | 96.875   |
| 3        | 100                                         | 100      | 100      | 100      | 95.45455 | 90.625   | 98.52941 | 100      |
| 4        | 100                                         | 100      | 96.9697  | 97.4359  | 100      | 92.64706 | 100      | 98.48485 |
| 5        | 100                                         | 96.9697  | 91.89189 | 90.32258 | 93.18182 | 100      | 98.71795 | 97.10145 |
| 6        | 100                                         | 93.18182 | 97.5     | 96.9697  | 92.68293 | 100      | 97.14286 | 98.55072 |
| 7        | 100                                         | 100      | 96.2963  | 97.36842 | 96.66667 | 96.49123 | 100      | 97.2973  |
| 8        | 96.875                                      | 100      | 100      | 100      | 100      | 97.72727 | 100      | 98.4375  |
| 9        | 100                                         | 94.59459 | 100      | 100      | 93.10345 | 100      | 98.66667 | 98.33333 |
| 10       | 94.11765                                    | 100      | 100      | 100      | 97.61905 | 100      | 97.1831  | 100      |
| 11       | 93.18182                                    | 100      | 97.77778 | 97.91667 | 100      | 98       | 100      | 100      |
| 12       | 100                                         | 100      | 94.87179 | 95.12195 | 100      | 96.61017 | 98.63014 | 94.54545 |
| $\mu$    | 97.88259                                    | 97.85277 | 96.84674 | 96.78982 | 96.91522 | 96.78468 | 98.6158  | 98.30213 |
| $\sigma$ | 2.815994                                    | 2.841241 | 2.914491 | 3.229685 | 2.82032  | 3.4115   | 1.190395 | 1.658207 |

|          |                                               |          |          |          |          |          |          |          |
|----------|-----------------------------------------------|----------|----------|----------|----------|----------|----------|----------|
| Sample   | NIH3T3 cell / TPE-PEGA-Hyd polymer, Figure 7d |          |          |          |          |          |          |          |
| Time     | 24 h                                          |          |          |          |          |          |          |          |
| C (mg/L) | 100                                           | 10       | 1        | 0.1      | 0.01     | 0.001    | 0.0001   | 0        |
| 1        | 100                                           | 100      | 100      | 91.30435 | 97.82609 | 100      | 98.48485 | 100      |
| 2        | 96.77419                                      | 97.22222 | 100      | 100      | 100      | 100      | 100      | 100      |
| 3        | 100                                           | 100      | 100      | 100      | 100      | 97.91667 | 100      | 100      |
| 4        | 100                                           | 97.4359  | 97.5     | 100      | 100      | 100      | 100      | 98.21429 |
| 5        | 100                                           | 97.5     | 100      | 100      | 89.74359 | 100      | 100      | 100      |
| 6        | 100                                           | 100      | 100      | 100      | 100      | 100      | 100      | 100      |
| 7        | 100                                           | 100      | 100      | 94.87179 | 100      | 100      | 98.4127  | 100      |
| 8        | 100                                           | 100      | 95.34884 | 100      | 95.12195 | 95       | 96.8254  | 100      |
| 9        | 100                                           | 100      | 100      | 97.36842 | 100      | 98.07692 | 100      | 95.91837 |
| 10       | 96                                            | 100      | 100      | 97.5     | 100      | 100      | 100      | 100      |
| 11       | 100                                           | 100      | 100      | 100      | 98.07692 | 100      | 100      | 98.48485 |
| 12       | 100                                           | 100      | 97.4359  | 100      | 95.65217 | 100      | 100      | 100      |
| $\mu$    | 99.39785                                      | 99.34651 | 99.19039 | 98.42038 | 98.03506 | 99.24947 | 99.47691 | 99.38479 |
| $\sigma$ | 1.415974                                      | 1.183834 | 1.554828 | 2.782178 | 3.162065 | 1.545636 | 1.027347 | 1.264998 |

| Sample   | NIH3T3 cell / TPE-PEGA-Hyd polymer, Figure 7d |          |          |          |          |          |          |          |
|----------|-----------------------------------------------|----------|----------|----------|----------|----------|----------|----------|
| Time     | 48 h                                          |          |          |          |          |          |          |          |
| C (mg/L) | 100                                           | 10       | 1        | 0.1      | 0.01     | 0.001    | 0.0001   | 0        |
| 1        | 100                                           | 97.36842 | 97.56098 | 100      | 100      | 100      | 95       | 100      |
| 2        | 100                                           | 100      | 97.5     | 100      | 100      | 97.14286 | 92.64706 | 98.11321 |
| 3        | 97.67442                                      | 97.2973  | 100      | 97.4359  | 100      | 94.87179 | 100      | 100      |
| 4        | 100                                           | 95       | 94.11765 | 100      | 100      | 100      | 94.44444 | 98.4127  |
| 5        | 95.45455                                      | 95.45455 | 100      | 94.59459 | 100      | 92.59259 | 98.11321 | 100      |
| 6        | 100                                           | 100      | 100      | 97.5     | 100      | 100      | 96.66667 | 100      |
| 7        | 100                                           | 100      | 100      | 90       | 100      | 100      | 100      | 97.01493 |
| 8        | 100                                           | 100      | 97.2973  | 97.5     | 97.22222 | 100      | 91.07143 | 100      |
| 9        | 97.22222                                      | 100      | 100      | 97.2973  | 95.45455 | 100      | 100      | 93.22034 |
| 10       | 100                                           | 100      | 100      | 97.14286 | 97.77778 | 100      | 100      | 98       |
| 11       | 100                                           | 95.12195 | 100      | 95.65217 | 95.83333 | 94.64286 | 100      | 100      |
| 12       | 100                                           | 97.61905 | 100      | 100      | 100      | 97.67442 | 98.18182 | 100      |
| $\mu$    | 99.19593                                      | 98.15511 | 98.87299 | 97.26024 | 98.85732 | 98.07704 | 97.17705 | 98.7301  |
| $\sigma$ | 1.538217                                      | 2.100035 | 1.879647 | 2.901234 | 1.783971 | 2.681004 | 3.190865 | 2.036087 |

| Sample   | NIH3T3 cell / TPE-PEGA-Hyd polymer, Figure 7d |          |          |          |          |          |          |          |
|----------|-----------------------------------------------|----------|----------|----------|----------|----------|----------|----------|
| Time     | 72 h                                          |          |          |          |          |          |          |          |
| C (mg/L) | 100                                           | 10       | 1        | 0.1      | 0.01     | 0.001    | 0.0001   | 0        |
| 1        | 100                                           | 100      | 100      | 100      | 100      | 100      | 100      | 100      |
| 2        | 100                                           | 100      | 96.2963  | 100      | 97.4359  | 100      | 100      | 98.27586 |
| 3        | 100                                           | 100      | 100      | 100      | 92.5     | 100      | 100      | 100      |
| 4        | 95                                            | 94.59459 | 100      | 92.68293 | 100      | 97.22222 | 98.14815 | 100      |
| 5        | 100                                           | 97.4359  | 100      | 94.87179 | 97.61905 | 97.4359  | 100      | 96.49123 |
| 6        | 100                                           | 100      | 94.59459 | 97.36842 | 100      | 97.36842 | 100      | 98.14815 |
| 7        | 85.29412                                      | 100      | 96.66667 | 100      | 94.87179 | 94.87179 | 95.91837 | 100      |
| 8        | 100                                           | 93.33333 | 100      | 92.10526 | 97.4359  | 100      | 90.56604 | 100      |
| 9        | 96.42857                                      | 100      | 100      | 100      | 100      | 100      | 100      | 100      |
| 10       | 100                                           | 100      | 97.2973  | 100      | 96.55172 | 100      | 100      | 100      |
| 11       | 100                                           | 93.10345 | 100      | 96.66667 | 94       | 97.91667 | 100      | 98.24561 |
| 12       | 96.66667                                      | 100      | 100      | 92.10526 | 100      | 96.22642 | 96.22642 | 100      |
| $\mu$    | 97.78245                                      | 98.20561 | 98.7379  | 97.15003 | 97.53453 | 98.42012 | 98.40491 | 99.2634  |
| $\sigma$ | 4.328748                                      | 2.847035 | 1.95952  | 3.371809 | 2.633953 | 1.812639 | 2.904496 | 1.178616 |

| Sample   | HeLa cell / TPE-PEGA-Hyd-DOX prodrug, Figure 7e |          |          |          |          |          |          |          |
|----------|-------------------------------------------------|----------|----------|----------|----------|----------|----------|----------|
| Time     | 24 h                                            |          |          |          |          |          |          |          |
| C (mg/L) | 100                                             | 10       | 1        | 0.1      | 0.01     | 0.001    | 0.0001   | 0        |
| 1        | 63.7325                                         | 75       | 71.875   | 85.71429 | 80       | 88.88889 | 92.85714 | 100      |
| 2        | 55.57692                                        | 65.38462 | 74.35897 | 82.35294 | 75       | 80.95238 | 100      | 87.09677 |
| 3        | 59.13043                                        | 69.56522 | 73.80952 | 78.78788 | 84.61538 | 83.72093 | 100      | 92.30769 |
| 4        | 53.83333                                        | 63.33333 | 68.42105 | 88.88889 | 82.85714 | 88.88889 | 96.2963  | 100      |
| 5        | 57.7654                                         | 68       | 77.5     | 88.88889 | 75.55647 | 91.30435 | 96.15385 | 96.2963  |
| 6        | 51.93333                                        | 63.33333 | 76.47059 | 85.71429 | 84.61538 | 91.30435 | 96.42857 | 94.11765 |
| 7        | 50.64706                                        | 61.76471 | 80.55556 | 82.35294 | 80       | 88.88889 | 93.10345 | 96.42857 |
| 8        | 48.6875                                         | 59.375   | 70.27027 | 82.35294 | 63.63636 | 88.88889 | 93.10345 | 96.15385 |
| 9        | 64.17391                                        | 78.26087 | 75.67568 | 78.78788 | 67.14286 | 78.04878 | 96.2963  | 100      |
| 10       | 58.57143                                        | 71.42857 | 76.31579 | 85.71429 | 63.63636 | 88.88889 | 100      | 93.93939 |
| 11       | 50.78947                                        | 63.15789 | 77.5     | 88.88889 | 80       | 86.36364 | 96.42857 | 90.625   |
| 12       | 45.55556                                        | 55.55556 | 85.29412 | 88.88889 | 69.56522 | 78.04878 | 92.59259 | 96.875   |
| $\mu$    | 55.03307                                        | 66.17992 | 75.67055 | 84.77775 | 75.5521  | 86.1823  | 96.10502 | 95.32002 |
| $\sigma$ | 5.836306                                        | 6.541572 | 4.52804  | 3.809478 | 7.791801 | 4.813338 | 2.807494 | 3.966826 |

| Sample   | HeLa cell / TPE-PEGA-Hyd-DOX prodrug, Figure 7e |          |          |          |          |          |          |          |
|----------|-------------------------------------------------|----------|----------|----------|----------|----------|----------|----------|
| Time     | 48 h                                            |          |          |          |          |          |          |          |
| C (mg/L) | 100                                             | 10       | 1        | 0.1      | 0.01     | 0.001    | 0.0001   | 0        |
| 1        | 31.57895                                        | 58.33333 | 65       | 82.35294 | 83.33333 | 85.36585 | 81.57895 | 94.73684 |
| 2        | 10                                              | 58.33333 | 52.94118 | 75       | 80       | 80       | 87.5     | 92.5     |
| 3        | 45.83333                                        | 45.45455 | 54.54545 | 76.31579 | 86.2069  | 79.54545 | 85.71429 | 94.59459 |
| 4        | 30.76923                                        | 45.45455 | 50       | 75.75758 | 93.33333 | 86.04651 | 85.29412 | 92.68293 |
| 5        | 37.5                                            | 58.33333 | 81.48148 | 72.5     | 70.73171 | 85       | 80.64516 | 100      |
| 6        | 35.71429                                        | 58.33333 | 77.27273 | 78.04878 | 87.09677 | 88.63636 | 96.875   | 94.73684 |

|          |          |          |          |          |          |          |          |          |
|----------|----------|----------|----------|----------|----------|----------|----------|----------|
| 7        | 45.83333 | 58.33333 | 78.94737 | 74.35897 | 86.11111 | 87.23404 | 91.42857 | 97.05882 |
| 8        | 28       | 41.66667 | 65.21739 | 77.14286 | 78.37838 | 82.35294 | 94.28571 | 94.44444 |
| 9        | 27.27273 | 58.33333 | 52.94118 | 71.79487 | 78.04878 | 80.85106 | 90.625   | 87.5     |
| 10       | 59.25926 | 58.33333 | 58.82353 | 74.28571 | 77.14286 | 82.97872 | 87.09677 | 94.11765 |
| 11       | 29.62963 | 30       | 72.22222 | 77.14286 | 86.11111 | 84.09091 | 85.29412 | 92.30769 |
| 12       | 48       | 11.11111 | 50       | 82.35294 | 78.78788 | 79.48718 | 92.59259 | 94.59459 |
| $\mu$    | 35.78256 | 48.50168 | 63.28271 | 76.42111 | 82.10685 | 83.46575 | 88.24419 | 94.1062  |
| $\sigma$ | 12.73435 | 15.02206 | 11.76236 | 3.332005 | 6.039078 | 3.096509 | 4.98685  | 2.959176 |

| Sample   | HeLa cell / TPE-PEGA-Hyd-DOX prodrug, Figure 7e |          |          |          |          |          |          |          |
|----------|-------------------------------------------------|----------|----------|----------|----------|----------|----------|----------|
| Time     | 72 h                                            |          |          |          |          |          |          |          |
| C (mg/L) | 100                                             | 10       | 1        | 0.1      | 0.01     | 0.001    | 0.0001   | 0        |
| 1        | 15                                              | 44.23077 | 52.08333 | 68.57143 | 72.10526 | 85.36585 | 91.17647 | 97.05882 |
| 2        | 7.407407                                        | 31.42857 | 53.33333 | 62.5     | 85.12195 | 88.09524 | 100      | 92.30769 |
| 3        | 9.677419                                        | 23.68421 | 50.98039 | 70       | 88.57143 | 92.68293 | 93.33333 | 88.57143 |
| 4        | 16.12903                                        | 31.42857 | 61.70213 | 63.88889 | 82.2973  | 93.54839 | 100      | 94.28571 |
| 5        | 16.66667                                        | 24.24242 | 54.90196 | 66.66667 | 85.29412 | 91.17647 | 94.11765 | 92.30769 |
| 6        | 10.52632                                        | 27.27273 | 55.31915 | 76.31579 | 85.36842 | 89.13043 | 96.55172 | 91.42857 |
| 7        | 15.625                                          | 31.57895 | 58.69565 | 65.78947 | 88.57143 | 84.09091 | 90.625   | 97.05882 |
| 8        | 13.7931                                         | 31.70732 | 56.14035 | 64.86486 | 87.36842 | 92.10526 | 91.42857 | 94.59459 |
| 9        | 19.44444                                        | 34.09091 | 56.25    | 75.67568 | 84.09091 | 95.12195 | 94.11765 | 92.85714 |
| 10       | 18.51852                                        | 34.21053 | 54.71698 | 72.5     | 84.09091 | 91.17647 | 97.14286 | 85.29412 |
| 11       | 9.375                                           | 35.71429 | 58       | 63.63636 | 88.57143 | 88.09524 | 93.93939 | 97.36842 |
| 12       | 13.33333                                        | 39.02439 | 56.36364 | 71.42857 | 89.74359 | 89.74359 | 94.73684 | 97.4359  |
| $\mu$    | 13.79135                                        | 32.38447 | 55.70724 | 68.48648 | 85.0996  | 90.02773 | 94.76412 | 93.38074 |
| $\sigma$ | 3.82471                                         | 5.821665 | 2.922172 | 4.71213  | 4.687761 | 3.270883 | 3.13885  | 3.773181 |

| Sample   | NIH3T3 cell / TPE-PEGA-Hyd-DOX prodrug, Figure 7f |          |          |          |          |          |          |          |
|----------|---------------------------------------------------|----------|----------|----------|----------|----------|----------|----------|
| Time     | 24 h                                              |          |          |          |          |          |          |          |
| C (mg/L) | 100                                               | 10       | 1        | 0.1      | 0.01     | 0.001    | 0.0001   | 0        |
| 1        | 73.52941                                          | 94.28571 | 94.59459 | 87.5     | 100      | 95.45455 | 92.85714 | 86.27451 |
| 2        | 77.08333                                          | 83.78378 | 83.78378 | 91.42857 | 93.33333 | 92.68293 | 96       | 88.09524 |
| 3        | 75.75758                                          | 79.41176 | 91.17647 | 100      | 94.44444 | 94.87179 | 97.91667 | 94.73684 |
| 4        | 86.66667                                          | 89.28571 | 94.87179 | 92.59259 | 90.47619 | 97.22222 | 100      | 92.68293 |
| 5        | 86.11111                                          | 90       | 92.10526 | 91.17647 | 92.5     | 83.72093 | 88.63636 | 97.22222 |
| 6        | 68.42105                                          | 91.17647 | 97.14286 | 90.2439  | 96.9697  | 88.63636 | 94.44444 | 89.3617  |
| 7        | 75.75758                                          | 80.76923 | 91.17647 | 90.47619 | 85.29412 | 92.68293 | 89.3617  | 97.36842 |
| 8        | 81.25                                             | 97.14286 | 96.9697  | 94.59459 | 89.74359 | 94.87179 | 91.48936 | 97.5     |
| 9        | 86.11111                                          | 88.88889 | 97.22222 | 92.5     | 84.09091 | 85.36585 | 93.54839 | 100      |
| 10       | 84.09091                                          | 75       | 85.29412 | 88.57143 | 100      | 94.11765 | 92.68293 | 95.45455 |
| 11       | 85.36585                                          | 95       | 92.30769 | 92.10526 | 88.57143 | 97.2973  | 95.34884 | 92.30769 |
| 12       | 77.19298                                          | 96       | 96.875   | 100      | 85.36585 | 93.93939 | 100      | 89.13043 |
| $\mu$    | 79.77813                                          | 88.39537 | 92.79333 | 92.59908 | 91.73246 | 92.57197 | 94.35715 | 93.34454 |
| $\sigma$ | 5.984515                                          | 7.157816 | 4.508053 | 3.924898 | 5.481747 | 4.399202 | 3.713084 | 4.388587 |

| Sample   | NIH3T3 cell / TPE-PEGA-Hyd-DOX prodrug, Figure 7f |          |          |          |          |          |          |          |
|----------|---------------------------------------------------|----------|----------|----------|----------|----------|----------|----------|
| Time     | 48 h                                              |          |          |          |          |          |          |          |
| C (mg/L) | 100                                               | 10       | 1        | 0.1      | 0.01     | 0.001    | 0.0001   | 0        |
| 1        | 78.78788                                          | 89.47368 | 94.28571 | 92.10526 | 92.30769 | 92.5     | 97.22222 | 87.17949 |
| 2        | 75                                                | 89.3617  | 86.36364 | 94.73684 | 94.28571 | 93.10345 | 97.05882 | 93.93939 |
| 3        | 63.33333                                          | 84.375   | 96       | 84.21053 | 89.47368 | 94.28571 | 96.875   | 97.05882 |
| 4        | 84.84848                                          | 78.125   | 93.10345 | 82.22222 | 92.5     | 94.11765 | 94.87179 | 100      |
| 5        | 60                                                | 79.48718 | 93.93939 | 86.66667 | 94.87179 | 92.10526 | 100      | 92.10526 |
| 6        | 89.47368                                          | 77.77778 | 94.44444 | 83.87097 | 94.59459 | 82.75862 | 97.61905 | 92.15686 |
| 7        | 71.42857                                          | 84.61538 | 86.48649 | 93.93939 | 96.55172 | 95.45455 | 94.59459 | 93.93939 |
| 8        | 82.14286                                          | 87.5     | 88.46154 | 96.66667 | 100      | 87.09677 | 96.9697  | 97.05882 |
| 9        | 65                                                | 86.48649 | 89.74359 | 86.2069  | 83.87097 | 91.30435 | 94.28571 | 94.87179 |
| 10       | 76.47059                                          | 90       | 93.10345 | 92.10526 | 91.17647 | 100      | 100      | 100      |
| 11       | 77.77778                                          | 77.41935 | 77.41935 | 97.05882 | 94.59459 | 97.36842 | 96.875   | 97.82609 |
| 12       | 77.27273                                          | 89.47368 | 85.71429 | 92.30769 | 88.88889 | 94.44444 | 100      | 97.05882 |
| $\mu$    | 75.12799                                          | 84.50794 | 89.92211 | 90.17477 | 92.75968 | 92.87827 | 97.19766 | 95.26623 |
| $\sigma$ | 8.844938                                          | 5.022027 | 5.338282 | 5.249474 | 4.132947 | 4.498375 | 2.01544  | 3.689568 |

| Sample   | NIH3T3 cell / TPE-PEGA-Hyd-DOX prodrug, Figure 7f |          |          |          |          |          |          |          |
|----------|---------------------------------------------------|----------|----------|----------|----------|----------|----------|----------|
| Time     | 72 h                                              |          |          |          |          |          |          |          |
| C (mg/L) | 100                                               | 10       | 1        | 0.1      | 0.01     | 0.001    | 0.0001   | 0        |
| 1        | 46.15385                                          | 90.47619 | 87.17949 | 92.68293 | 94.28571 | 94.59459 | 100      | 91.42857 |
| 2        | 87.09677                                          | 91.30435 | 92.5     | 87.5     | 90.32258 | 94.87179 | 97.36842 | 97.22222 |
| 3        | 63.63636                                          | 82.92683 | 88.37209 | 84       | 96.875   | 97.4359  | 88.63636 | 100      |
| 4        | 66.66667                                          | 84       | 89.74359 | 92.30769 | 88.88889 | 93.54839 | 88.88889 | 96.9697  |
| 5        | 54.54545                                          | 85.71429 | 90.32258 | 93.33333 | 92.68293 | 100      | 94.59459 | 97.22222 |
| 6        | 66.66667                                          | 87.5     | 92.30769 | 88.37209 | 97.36842 | 85.41667 | 96.66667 | 94.87179 |
| 7        | 70.83333                                          | 90.2439  | 92.10526 | 93.75    | 97.61905 | 97.36842 | 96.15385 | 100      |
| 8        | 73.68421                                          | 100      | 91.11111 | 92.85714 | 96.15385 | 92.10526 | 91.17647 | 97.36842 |
| 9        | 65.38462                                          | 79.54545 | 97.4359  | 96.42857 | 91.17647 | 97.5     | 100      | 100      |
| 10       | 67.56757                                          | 88.09524 | 90       | 86.11111 | 94.44444 | 100      | 97.2973  | 89.74359 |
| 11       | 59.09091                                          | 83.33333 | 96.66667 | 96.9697  | 97.36842 | 88.09524 | 96.875   | 97.2973  |
| 12       | 82.85714                                          | 85.71429 | 84.375   | 100      | 100      | 94.59459 | 94.44444 | 100      |
| $\mu$    | 67.0153                                           | 87.40449 | 91.00995 | 92.02605 | 94.76548 | 94.62757 | 95.17517 | 96.84365 |
| $\sigma$ | 11.20633                                          | 5.287481 | 3.657558 | 4.7341   | 3.401821 | 4.436178 | 3.826671 | 3.360953 |
